# Supplementary material for: Nanomechanical properties of enucleated cells: contribution of the nucleus to the passive cell mechanics
Source: PubMed Central journal article supplement (PMC7500557; doi:10.1186/s12951-020-00696-1), 2020-09-17
Supplement: 12951_2020_696_MOESM1_ESM.pdf [file 12951_2020_696_MOESM1_ESM.pdf]

**Supplementary data**  
**Nanomechanical properties of enucleated cells: contribution of the nucleus**  
**to the passive cell mechanics**

Yu.M. Efremov, S.L. Kotova, A.A. Akovantseva, P.S. Timashev

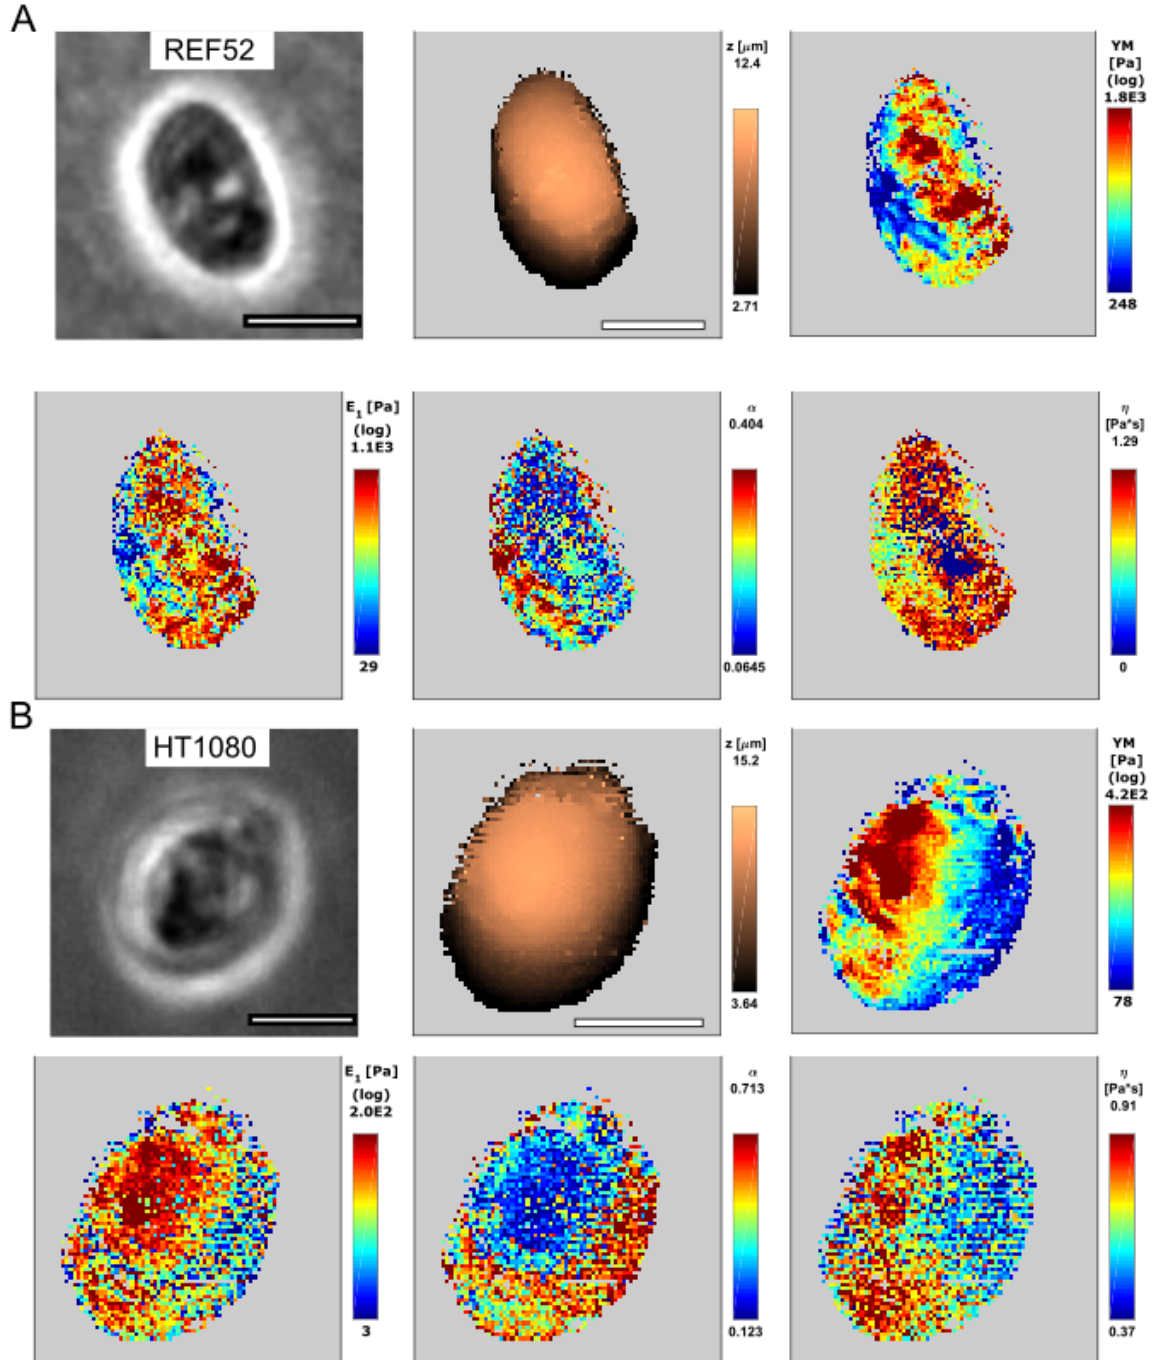

**Figure S1.** Examples of nanomechanical maps acquired over REF52 (A) and HT1080 (B) nucleoplasts: the topography ( $z$ ), apparent YM, and viscoelastic parameters ( $E_1$ ,  $\alpha$ ,  $\eta$ ). Scale bars are 10  $\mu\text{m}$ .
